# Supplementary material for: Cost and energy intensity of U.S. potable water reuse systems
Source: Royal Society of Chemistry journal article supplement (doi:10.1039/d1ew00017a), 2021-01-01
Supplement: d1ew00017a1.pdf [file d1ew00017a1.pdf]

Supporting Information for

**Cost and Energy Intensity of U.S. Potable Water Reuse Systems**

**Alison Sim<sup>a</sup> and Meagan S. Mauter<sup>a,\*</sup>**

<sup>a</sup> *Department of Civil and Environmental Engineering, Stanford University, CA 94305, USA.*

\*Corresponding author: E-mail: [mauter@stanford.edu](mailto:mauter@stanford.edu)

**Supporting Information Summary:**

This supporting information contains 1) dataset of general features and costs of potable reuse systems; 2) method of matching PWS IDs in SDWIS to potable reuse facilities; 3) water AHEAD model input, outputs, and assumptions; 4) additional details of potable reuse systems, such as cumulative history and locations.

## 1.0 Datasets and Sources

**Table S1.** Dataset of general potable reuse system information. The semicolon indicates parallel treatment trains tested in pilot study. Treatment trains listed are reported to the detail that the source provides. Type of chemical post-treatment or chlorination is often not specified. As facilities undergo expansions or upgrades, treatment trains and capacities are subject to change.

| project.name                                                                                 | state | reuse type | year installed | augmentation type | augmentation method                | capacity (mgd) | capacity (m3d) | status                | treatment                                                                                                                                     | sourcewater        |
|----------------------------------------------------------------------------------------------|-------|------------|----------------|-------------------|------------------------------------|----------------|----------------|-----------------------|-----------------------------------------------------------------------------------------------------------------------------------------------|--------------------|
| Montebello Forebay County Sanitation Districts of Los Angeles County                         | CA    | IPR        | 1962           | GW                | spreading basins                   | 44             | 166540         | Operational           | Soil-aquifer Treatment                                                                                                                        | tertiary effluent  |
| Upper Occoquan Service Authority                                                             | VA    | IPR        | 1978           | SW                |                                    | 54             | 204390         | Operational           | Rapid Mix - Flocculation - Sedimentation - Recarbonation - Media Filtration - GAC - Chlorination                                              | secondary effluent |
| Denver Potable Reuse Demonstration                                                           | CO    | DPR        | 1980           |                   |                                    | 1              | 3785           | Demonstration Project | Rapid Mix - Flocculation - Recarbonation - Ballast Pond - Media Filtration - IEX - GAC - Ozone - UV - GAC - RO - Air Stripping - Chlorination | secondary effluent |
| Hueco Bolson Recharge Project, El Paso Water Utilities                                       | TX    | IPR        | 1985           | GW                | direct injection, spreading basins | 12             | 45420          | Operational           | Primary Treatment - Secondary Treatment - PACT Filter - pH Adjustment - Media Filtration - Ozone - GAC - Chlorination - Storage               | secondary effluent |
| Clayton County Water Authority                                                               | GA    | IPR        | 1985           | SW                |                                    | 12             | 45420          | Operational           | Constructed Wetlands                                                                                                                          | secondary effluent |
| City of Tampa Water Resource Recovery Project                                                | FL    | IPR        | 1987           | GW                | direct injection                   | 0.072          | 273            | Pilot study           | Preaeration - Lime Addition - Recarbonation - Media Filtration - GAC - Ozone                                                                  | secondary effluent |
| City of West Palm Beach Constructed Wetlands Demonstration Project                           | FL    | IPR        | 1996           | SW                | wetlands                           | 0.15           | 568            | Demonstration Project | Coagulation - Nitrifying Filters - Chlorination - Constructed Wetlands                                                                        | secondary effluent |
| Gwinnett County                                                                              | GA    | IPR        | 1999           | SW                |                                    | 60             | 227100         | Operational           | Chemical Clarification - Sedimentation - UF - Media Filtration - Ozone - BAF - Ozone                                                          | secondary effluent |
| Yelm Cochrane Memorial Park                                                                  | WA    | IPR        | 1999           | SW                | wetlands                           | 0.05           | 189            | Operational           | Constructed Wetlands                                                                                                                          | tertiary effluent  |
| City of Ephrata                                                                              | WA    | IPR        | 2000           | GW                | spreading basins                   | 0.6            | 2271           | Operational           | Secondary Treatment - Coagulation - Media Filtration - UV                                                                                     | raw wastewater     |
| Grant County Royal City                                                                      | WA    | IPR        | 2000           | GW                | spreading basins                   | 0.25           | 946            | Operational           | Secondary Treatment - Coagulation - Rapid Mix - Cloth Disk Filter - UV                                                                        | raw wastewater     |
| Grant County Quincy City                                                                     | WA    | IPR        | 2002           | GW                | spreading basins                   | 1.5            | 5678           | Operational           | SBR - Coagulation - Media Filtration - UV                                                                                                     | raw wastewater     |
| Los Alamitos Barrier Water Replenishment (Leo J Vander Lans Water Treatment Facility)        | CA    | IPR        | 2005           | GW                | direct injection                   | 8              | 30280          | Operational           | MF - RO - UV/AOP (H2O2) - Decarbonation - Chlorination                                                                                        | tertiary effluent  |
| LOTT Cleanwater Alliance Hawk's Prairie Ponds                                                | WA    | IPR        | 2006           | SW                | wetlands, spreading basins         | 1.5            | 5678           | Operational           | Constructed Wetlands                                                                                                                          | tertiary effluent  |
| City of Sunrise Advanced Water Treatment and Reuse Pilot                                     | FL    | IPR        | 2007           | GW                |                                    | 0.014          | 55             | Pilot study           | BNR - MBR - RO - UV/AOP (Ozone); BNR - MBR - UV/AOP (Ozone); BNR - MBR - Coagulation - Media Filtration - UV/AOP (Ozone)                      | secondary effluent |
| City of Plantation Advanced Wastewater Treatment Pilot                                       | FL    | IPR        | 2007           | SW                |                                    | 0.014          | 55             | Pilot study           | MBR - BNR - RO - UV; Denitrifying Filters - UF - RO - UV                                                                                      | surface water      |
| Chino Basin Groundwater Recharge Project Inland Empire Utility Agency                        | CA    | IPR        | 2007           | GW                | spreading basins                   | 18             | 68130          | Operational           | Soil-aquifer Treatment                                                                                                                        | tertiary effluent  |
| Miami-Dade County Coastal Wetlands Rehydration Demonstration Pilot                           | FL    | IPR        | 2009           | GW                | direct injection                   | 0.173          | 654            | Pilot study           | Media Filtration - Chlorination - MF - RO - IEX - UV/AOP (H2O2)                                                                               | secondary effluent |
| North Texas Municipal Water District East Fork Water Reuse Project                           | TX    | IPR        | 2009           | SW                |                                    | 90             | 340650         | Operational           | Constructed Wetlands                                                                                                                          | surface water      |
| Arapahoe County Cottonwood                                                                   | CO    | IPR        | 2009           | GW                |                                    | 6              | 22710          | Operational           | Riverbank Filtration - RO - UV/AOP (H2O2) - Air Stripping - Chlorination                                                                      | tertiary effluent  |
| Town of Davie Advanced Water Treatment for Aquifer Recharge and Indirect Potable Reuse Pilot | FL    | IPR        | 2010           | GW                | direct injection                   | 0.022          | 82             | Pilot study           | UF - RO - UV                                                                                                                                  | secondary effluent |
| Prairie Water Project Aurora                                                                 | CO    | IPR        | 2010           | GW                |                                    | 50             | 189250         | Operational           | Riverbank Filtration - Aquifer Recharge - Chemical Softening - UV/AOP (H2O2) - Media Filtration - GAC - Chlorination                          | surface water      |
| City of Tenino Class A Reclaimed Water Facility                                              | WA    | IPR        | 2011           | GW                | spreading basins                   | 0.375          | 1419           | Operational           | MBR - Chlorination                                                                                                                            | raw wastewater     |
| Airway Heights                                                                               | WA    | IPR        | 2012           | GW                | spreading basins                   | 1.5            | 5678           | Operational           | Preliminary Treatment - Secondary Treatment - Tertiary Treatment - UV - Post Treatment                                                        | raw wastewater     |
| Western Reverse Land Conservancy Tangent WaterCycle                                          | OH    | DPR        | 2013           | DD                |                                    | 0.360          | 1363           | Demonstration Project | MBR - RO - UV/AOP (H2O2) - Post Treatment - Chlorination                                                                                      | raw wastewater     |
| City of Hollywood Effluent Recharge Treatment Pilot                                          | FL    | IPR        | 2013           | GW                | direct injection                   | 0.014          | 55             | Pilot study           | Media Filtration - IEX - UV/AOP (H2O2) - BAC; Media Filtration - IEX - Ozone - BAC - UV                                                       | secondary effluent |
| Tarrant Regional Water District                                                              | TX    | IPR        | 2013           | SW                |                                    | 90             | 340650         | Operational           | Constructed Wetlands                                                                                                                          | surface water      |
| Big Spring Colorado River Municipal Water District                                           | TX    | DPR        | 2013           | SW                | blending                           | 1.8            | 6813           | Operational           | MF - RO - UV/AOP (H2O2) - Blending - Coagulation - Flocculation - Sedimentation - Chlorination                                                | tertiary effluent  |

|                                                                                     |    |     |        |    |                  |        |        |                       |                                                                                       |                    |
|-------------------------------------------------------------------------------------|----|-----|--------|----|------------------|--------|--------|-----------------------|---------------------------------------------------------------------------------------|--------------------|
| Wichita Falls Cypress Water Treatment Plant (DPR)                                   | TX | DPR | 2014   | SW |                  | 5      | 18925  | Decommissioned        | MF - RO - UV - 50/50 SW Blend - Drinking Water Treatment                              | secondary effluent |
| Orange County Groundwater Replenishment System                                      | CA | IPR | 2014   | GW | direct injection | 100    | 378500 | Operational           | MF - RO - UV/AOP (H2O2) - Decarbonation - Lime Addition                               | secondary effluent |
| West Basin Recycling Plant Groundwater Replenishment and Seawater Barrier           | CA | IPR | 2014   | GW | direct injection | 12.5   | 47313  | Operational           | MF - RO - UV/AOP (H2O2) - Decarbonation - pH Adjustment                               | secondary effluent |
| City of Tucson Potable Reuse Pilot                                                  | AZ | IPR | 2014   | SW |                  | 0.014  | 55     | Pilot study           | Soil-aquifer Treatment - NF - Ozone - BAF                                             | secondary effluent |
| Cambria Emergency Water Supply                                                      | CA | IPR | 2014   | GW | direct injection | 0.65   | 2460   | Operational           | MF - RO - UV/AOP (H2O2) - Post Treatment - Chlorination                               | surface water      |
| Dominguez Gap Barrier Terminal Island, City of                                      | CA | IPR | 2014   | GW | direct injection | 12     | 45420  | Operational           | MF - RO - UV/AOP (H2O2) - Chlorination                                                | tertiary effluent  |
| Silicon Valley Advanced Purification Center                                         | CA | IPR | 2014   | GW | direct injection | 8      | 30280  | Operational           | MF - RO - UV/AOP (H2O2)                                                               | tertiary effluent  |
| Scottsdale Water Campus                                                             | AZ | IPR | 2014   | GW | direct injection | 20     | 75700  | Operational           | Ozone - UF - RO - UV - Lime Addition - Decarbonation                                  | tertiary effluent  |
| City of Abilene Hamby Water Reclamation Facility and Indirect Reuse Project         | TX | IPR | 2015   | SW |                  | 22     | 83270  | Operational           | MBR - RO - Ozone - BAF - Chlorination                                                 | raw wastewater     |
| Ventura Pure Water                                                                  | CA | DPR | 2015   | GW | direct injection | 0.043  | 164    | Demonstration Project | Pasteurization - UF - RO - UV/AOP (H2O2)                                              | tertiary effluent  |
| City of Oxnard Advanced Water Treatment Facility                                    | CA | IPR | 2016   | GW | direct injection | 6      | 22710  | Operational           | MF - RO - UV/AOP (H2O2) - Decarbonation - Lime Addition                               | secondary effluent |
| Gwinett County Pilot Study                                                          | GA | DPR | 2016   | SW |                  | 0.0086 | 33     | Pilot study           | Ozone - Rapid Mix - Flocculation - BAF - BAC - Chlorination                           | surface water      |
| San Francisco Public Utilities Commission PureWater                                 | CA |     | 2016   |    |                  | 0.001  | 5      | Pilot study           | UF - RO - UV - Chlorination                                                           | surface water      |
| Hillsborough County Direct Potable Reuse Demonstration                              | FL | DPR | 2016   | SW |                  | 0.029  | 109    | Demonstration Project | UF - RO - UV/AOP (H2O2)                                                               | tertiary effluent  |
| Village of Cloudcroft DPR Project                                                   | NM | DPR | 2017   | DD | blending         | 0.18   | 681    | Demonstration Project | MBR - Chlorination - Storage - RO - UV/AOP (H2O2) -                                   | raw wastewater     |
| City of Altamonte Springs pureALTA                                                  | FL | IPR | 2017   |    |                  | 0.28   | 1060   | Pilot study           | Ozone - BAC - UF - GAC - UV/AOP (H2O2)                                                | tertiary effluent  |
| Wichita Falls Resource Recovery Facility                                            | TX | IPR | 2018   | SW |                  | 16     | 60560  | Operational           | Cloth Disk Filter - Advanced Tertiary Treatment                                       | secondary effluent |
| Texas A&M University Direct Potable Reuse Research & Demo                           | TX | DPR | 2018   |    |                  | 0.0005 | 2      | Demonstration Project | GAC - Ozone - Chlorination - RO - UV                                                  | secondary effluent |
| Portland Clean Water Services Pure Water Brew                                       | OR | DPR | 2018   | SW |                  |        |        | Operational           | UF - RO - UV/AOP (H2O2)                                                               | tertiary effluent  |
| Big Bear Area Regional Wastewater Agency Replenish Big Bear                         | CA | IPR | 2019   | SW |                  | 1.6    | 6056   | Not Built             | Not yet determined                                                                    | secondary effluent |
| Pure Water Oceanside                                                                | CA | IPR | 2019   | SW |                  | 4      | 15140  | Not Built             | MF - RO - UV/AOP (Cl) - Post Treatment                                                | secondary effluent |
| City of Pismo Beach Central Coast Blue                                              | CA | IPR | 2019   | GW | direct injection | 3.1    | 11734  | Not Built             | MF - UF - RO - UV/AOP (H2O2)                                                          | secondary effluent |
| Metropolitan Water District of Southern California                                  | CA | IPR | 2019   | GW | spreading basins | 0.5    | 1893   | Demonstration Project | MBR - RO - UV/AOP (H2O2) - Post Treatment                                             | secondary effluent |
| City of Daytona Beach Direct Potable Reuse Demo Test System                         | FL | DPR | 2019   | SW |                  | 0.2    | 757    | Demonstration Project | UF - RO - UV/AOP (H2O2)                                                               | tertiary effluent  |
| Las Virgenes-Triunfo Join Powers Authority Pure Water Project                       | CA | IPR | 2019   | SW |                  |        |        | Demonstration Project | UF - RO - UV/AOP (H2O2)                                                               | tertiary effluent  |
| Carpinteria Valley Water District Advanced Purification Project                     | CA | IPR | 2020   | GW | direct injection | 1      | 3785   | Not Built             | MF - UF - RO - UV/AOP (Cl)                                                            | secondary effluent |
| Soquel Creek Water District Pure Water Soquel                                       | WA | IPR | 2020   | GW | direct injection | 1.3    | 4921   | Not Built             | MF - RO - UV/AOP (H2O2)                                                               | tertiary effluent  |
| Jacksonville Electric Authority Water Purification Treatment Demonstration Facility | FL | DPR | Future | GW | direct injection | 1      | 3785   | Demonstration Project | UF - LPFO - pH Adjustment - UV/AOP                                                    | secondary effluent |
| Hampton Road Sanitation District SWIFT Project                                      | TX | IPR | Future | GW | direct injection | 1      | 3785   | Demonstration Project | Flocculation - Sedimentation - Ozone - BAF - GAC - UV - Chlorination - Post-Treatment | secondary effluent |
| Pure Water Monterey                                                                 | CA | IPR | Future | GW | direct injection | 7      | 26495  | Not Built             | Ozone - (BAF) - MF - RO - UV/AOP (H2O2) - Post Treatment                              | secondary effluent |
| El Paso Advanced Water Purification Facility                                        | TX | DPR | Future | DD |                  | 10     | 37850  | Not Built             | MF - UF - RO - UV/AOP (H2O2) - GAC - Chlorination - Storage                           | secondary effluent |
| Laguna Madre Water District                                                         | TX | DPR | Future | SW |                  | 1      | 3785   | Not Built             | Not yet determined                                                                    | secondary effluent |
| East County Advanced Water Purification Program                                     | CA | IPR | Future | GW | direct injection | 11.5   | 43528  | Not Built             | MF - RO - UV/AOP (H2O2) - Chlorination                                                | secondary effluent |
| Scottsdale Water Campus DPR Permit                                                  | AZ | DPR | Future | SW |                  |        |        | Not Built             | UF - RO - UV - UV - GAC                                                               | surface water      |
| Palmdale Water District Groundwater Recharge and Recovery Project                   | CA | IPR | Future | GW | spreading basins | 46     | 174110 | Not Built             | Soil-aquifer Treatment                                                                | surface water      |
| City of Clearwater and the Southwest Florida Water Management District              | FL | IPR | Future | GW | direct injection | 3      | 11355  | Not Built             | UF - RO - UV/AOP (H2O2) - Microcontactor - Recarbonation - Lime Addition              | tertiary effluent  |
| Groundwater Reliability Improvement Project (GRIP)                                  | CA | IPR | Future | GW |                  | 15     | 56775  | Not Built             | MF - UF - RO - UV/AOP (Cl) - Post Treatment                                           | tertiary effluent  |
| North City Pure Water Purification Facility (Phase 1)                               | CA | IPR | Future | SW |                  | 30     | 113550 | Not Built             | Ozone - BAF - MF - UF - RO - UV/AOP (H2O2) - Post Treatment - Chlorination            | tertiary effluent  |
| Donald C Tillman Water Reclamation Plant                                            | CA | IPR | Future | GW | spreading basins | 25     | 94625  | Not Built             | Ozone - BAC - UV/AOP (H2O2)                                                           | tertiary effluent  |
| City of Brownwood                                                                   | TX | DPR | Future | SW |                  | 1.25   | 4731   | Not Built             | Chlorination - UF - UV - Chlorination - Dechlorination - RO - GAC - UV - Chlorination | tertiary effluent  |
| Kitsap County Kingston Recycled Water Project                                       | WA | IPR | Future | GW | spreading basins | 0.5    | 1893   | Not Built             | Soil-aquifer Treatment                                                                | tertiary effluent  |
| Eastern Municipal Water District                                                    | CA | IPR | Future | GW | spreading basins | 11     | 41635  | Not Built             | MF - RO - Ponds                                                                       | tertiary effluent  |

**Table S2.** Dataset of costs for selected potable reuse systems.

| Project Name                                                                          | Status                | Multistate Project | Plant Cost (\$MM 2020) | O&M Cost (\$MM/yr 2020) | Total Capital Costs (\$MM 2020) | Available Breakdown (Bolded year used for inflation adjustment)                                                                                                                 | Numeric label for systems in Figure 6. | Notes                                                                                                             |
|---------------------------------------------------------------------------------------|-----------------------|--------------------|------------------------|-------------------------|---------------------------------|---------------------------------------------------------------------------------------------------------------------------------------------------------------------------------|----------------------------------------|-------------------------------------------------------------------------------------------------------------------|
| Upper Occoquan Service Authority                                                      | Operational           | Y                  | n/a                    | n/a                     | <b>907</b>                      | \$78 million (1973-1978) for 15 mgd; \$21 million (1985-1987) for expansion to 27 mgd; \$38 million (1993-1996) for interim-expansion to 32 mgd; \$200 million (1996) to 54 mgd |                                        | Not including CIP capital costs since 2011.                                                                       |
| Denver Potable Reuse Demonstration                                                    | Demonstration Project | N                  | <b>71</b>              | <b>2.1</b>              | n/a                             | Total project cost (1979-1993): \$34.3 million, Design & Construction: \$19.8 million O&M: \$8.4 million                                                                        |                                        | Outlier in costs.                                                                                                 |
| Hueco Bolson Recharge Project (Fred Hervey Water Reclamation Plant)                   | Operational           | N                  | n/a                    | n/a                     | <b>80</b>                       | Capital cost: \$33 million (1985); treatment cost: \$1.54/kgal (2015)                                                                                                           |                                        |                                                                                                                   |
| Gwinnett County (F. Wayne Hill)                                                       | Operational           | Y                  | <b>763</b>             | n/a                     | <b>849</b>                      | \$200 million initial plan construction (1999); \$350 million facility expansion (2006); \$72 million pipeline (2010)                                                           | 1                                      |                                                                                                                   |
| Prairie Water Project                                                                 | Operational           | N                  | <b>786</b>             | n/a                     | <b>976</b>                      | Total plant cost: \$659 million (2010); \$160 million pipeline (2010)                                                                                                           | 3                                      | Constructed \$100 million below budget.                                                                           |
| Los Alamitos Barrier Water Replenishment (Leo J Vander Lans Water Treatment Facility) | Operational           | Y                  | <b>64</b>              | <b>5.3</b>              | n/a                             | Initial phase construction: \$17 million (2001-2005); total construction cost: \$52.2 million (2014); planning and design \$5.96 million (2014); O&M: \$4.8 million/yr (2014)   | 2                                      | At time of publication, O&M and total construction costs were estimates. Only initial phase had been constructed. |
| City of Tenino Class A Reclaimed Water Facility                                       | Operational           | N                  | n/a                    | n/a                     | <b>7.5</b>                      | Total project cost: \$6.2 million (2009)                                                                                                                                        |                                        |                                                                                                                   |
| Big Spring Colorado River Municipal Water District                                    | Operational           | N                  | <b>15.6</b>            | <b>0.84</b>             | n/a                             | Treatment facility cost: \$14 million (2013)                                                                                                                                    | 4                                      | Note the operating costs were from design report.                                                                 |
| Dominguez Gap Barrier (Terminal Island Water Reclamation Plant)                       | Operational           | N                  | <b>87</b>              | n/a                     | n/a                             | Treatment facility cost: \$23 million (2002). Expansion from 5 mgd to 12 mgd: \$50 million (2016)                                                                               | 5                                      |                                                                                                                   |
| Silicon Valley Advanced Purification Center                                           | Operational           | N                  | <b>79</b>              | n/a                     | n/a                             | Treatment facility cost: \$72 million (2014)                                                                                                                                    | 9                                      |                                                                                                                   |
| Orange County Groundwater Replenishment System                                        | Operational           | Y                  | n/a                    | <b>40</b>               | <b>823</b>                      | Initial phase of 70 mgd: \$481 million (2008); Expansion to 100 mgd: \$142.7 million (2012)                                                                                     |                                        | Expansion cost to 130 mgd not included. O&M cost estimate (see GWRS FAQs).                                        |
| City of Abilene Hamby Water Reclamation Facility and Indirect Reuse Project           | Operational           | N                  | n/a                    | n/a                     | <b>90</b>                       | Planning/design, construction permitting cost: \$82 million (2015)                                                                                                              |                                        |                                                                                                                   |
| Hillsborough County Direct Potable Reuse Demonstration                                | Demonstration Project | N                  | n/a                    | n/a                     | <b>0.22</b>                     | Demonstration cost: \$0.2 million (2016)                                                                                                                                        |                                        | Estimated cost.                                                                                                   |
| City of Plantation Advanced Wastewater Treatment Pilot                                | Pilot Study           | N                  | n/a                    | n/a                     | <b>0.38</b>                     | Pilot program cost: \$0.3 million (2007)                                                                                                                                        |                                        |                                                                                                                   |
| Miami-Dade County Coastal Wetlands Rehydration Demonstration Pilot Project            | Pilot Study           | N                  | n/a                    | n/a                     | <b>2.0</b>                      | Pilot program cost: \$1.7 million (2009)                                                                                                                                        |                                        |                                                                                                                   |
| City of Oxnard Advanced Water Treatment Facility                                      | Unbuilt               | N                  | n/a                    | n/a                     | <b>91</b>                       | Total project cost: \$80 million (2012)                                                                                                                                         |                                        |                                                                                                                   |
| City of Altamonte Springs pureALTA                                                    | Unbuilt               | N                  | n/a                    | n/a                     | <b>1.1</b>                      | Total project cost: \$1 mill (2016)                                                                                                                                             |                                        |                                                                                                                   |
| City of Daytona Beach Direct Potable Reuse Demo Test System                           | Demonstration Project | N                  | n/a                    | n/a                     | <b>3.9</b>                      | Total program cost: \$3.7 million (2017)                                                                                                                                        |                                        | Operated from 2018 to 2020.                                                                                       |
| Village of Cloudcroft DPR Project                                                     | Demonstration Project | N                  | n/a                    | <b>0.38</b>             | <b>5.5</b>                      | Total capital costs (2015): \$5 million; including \$1.4 million upgrade to WWTP; O&M costs: \$350,000/year                                                                     |                                        |                                                                                                                   |
| Big Bear Area Regional Wastewater Agency Replenish Big Bear                           | Unbuilt               | N                  | n/a                    | n/a                     | <b>44</b>                       | Total project cost: \$43.7 million (2019)                                                                                                                                       |                                        | Feasibility cost estimate.                                                                                        |
| Carpinteria Valley Water District Advanced Purification Project                       | Unbuilt               | N                  | n/a                    | n/a                     | <b>24</b>                       | Total project cost: \$23.2 million (2019)                                                                                                                                       |                                        | Feasibility cost estimate. Estimate includes pump and conveyance (pipeline) costs.                                |
| Pure Water Oceanside                                                                  | Unbuilt               | N                  | <b>49</b>              | n/a                     | <b>84.2</b>                     | Facility cost: \$48 million (2019), Total project cost: \$84.2 million (2020)                                                                                                   | 7                                      | Engineer estimated cost.                                                                                          |
| City of Pismo Beach Central Coast Blue                                                | Unbuilt               | N                  | <b>31.5</b>            | <b>2.3</b>              | <b>51</b>                       | Treatment facility cost estimates: \$17-31 million (2019); distribution infrastructure: \$11-19 million (2019); Annual O&M: \$1.8-2.3 million (2019)                            | 8                                      |                                                                                                                   |
| Pure Water Monterey                                                                   | Unbuilt               | Y                  | <b>49.8</b>            | <b>2.7</b>              | n/a                             | Advanced Water Purification Facility cost (2016): \$46 million; O&M cost: \$2.5 million; Expansion from 5 mgd to 7 mgd cost: \$32.5 million (2018)                              | 6                                      | Cost of expansion is cost opinion, not included.                                                                  |
| El Paso Advanced Water Purification Facility                                          | Unbuilt               | N                  | n/a                    | n/a                     | <b>153</b>                      | Estimated total project cost range is between \$110 and \$150 million (2019).                                                                                                   |                                        | Took higher end cost estimate.                                                                                    |
| Groundwater Reliability Improvement Project (Albert Robles Center)                    | Unbuilt               | N                  | <b>119</b>             | n/a                     | n/a                             | Facility project cost: \$110 million (2016)                                                                                                                                     | 10                                     |                                                                                                                   |

A complete list of Table S1 and Table S2 references are publicly available on the NAWI Water Data Analysis and Management System (DAMS) database at <https://dx.doi.org/10.15473/1700651> and <https://dx.doi.org/10.15473/1700652>.

## 2.0 Matching potable reuse projects to SDWIS public water system identification (IDs)

We first extract SDWIS quarterly reports from 2018, matching operational potable reuse systems from the NRC (2012) report, EPA (2017) compendium, and our aggregated data from plant technical documentation to public water systems (PWSs) by name or city. From our dataset, no new potable reuse systems were reported as operational in 2019 or 2020. For cities that contain multiple PWSs, we refined our matching process using system capacity in million gallons per day (MGD). We multiply the county-wide gallons per capita per day (gpcd) calculated in prior work<sup>1</sup> by the PWS population served to approximate the facility's capacity, choosing the PWS with the closest system capacity. If there is no initial match by name, city, or capacity, the PWS is identified through manual inspection.

## 3.0 Water AHEAD Model Inputs and Limitations

The Water Associated Health and Environmental Air Damages (AHEAD) tool is a model that predicts embedded greenhouse gas (GHG) emissions and related climate and health damages for unit processes used in drinking water, municipal wastewater, and industrial wastewater plants.<sup>2</sup> In the model graphical user interface (GUI), the user can specify the plant's capacity in m<sup>3</sup>/day, the geography (i.e., state) of the electricity grid and chemical manufacturing sources, the treatment train unit processes and corresponding recoveries. The model outputs annual air emission damages (\$K/year) in 2015\$ with a value of a statistical life (VSL) of \$8.6 million and a social cost of carbon (scc) of \$40 per short ton of CO<sub>2</sub>. The user can also specify the VSL and scc in the model.

The following equations are embedded in the Water AHEAD program to calculate health and climate damages due to electrical energy consumption. Unit GHG electricity emissions per m<sup>3</sup> of water are multiplied by a conversion factor from short tons to grams and \$/short ton of GHG from AP2 and EASIUR to obtain unit GHG damages in \$/m<sup>3</sup>. The total health damages comprise of the sum of unit NO<sub>x</sub>, SO<sub>2</sub>, and PM<sub>2.5</sub> damages.

$$Unit\ NO_x\ Damages\ \left[ \frac{\$}{m^3} \right] = \frac{g_{NO_x}}{m^3} * \frac{ton_{NO_x}}{907184\ g} * \frac{\$}{ton_{NO_x}}$$

$$Unit\ SO_2\ Damages\ \left[ \frac{\$}{m^3} \right] = \frac{g_{SO_2}}{m^3} * \frac{ton_{SO_2}}{907184\ g} * \frac{\$}{ton_{SO_2}}$$

$$Unit\ PM_{2.5}\ Damages\ \left[ \frac{\$}{m^3} \right] = \frac{g_{PM_{2.5}}}{m^3} * \frac{ton_{PM_{2.5}}}{907184\ g} * \frac{\$}{ton_{PM_{2.5}}}$$

$$Total\ health\ damages \left[ \frac{\$}{m^3} \right] = NO_x\ Damages + SO_2\ Damages + PM_{2.5}\ Damages$$

The total climate damages from electricity consumption comprise of damages from CO<sub>2</sub> emissions, calculated from unit CO<sub>2</sub> emissions and the scc (\$/ton).

$$Total\ climate\ damages \left[ \frac{\$}{m^3} \right] = Unit\ CO_2\ Damages \left[ \frac{\$}{m^3} \right] = \frac{g_{CO_2}}{m^3} * \frac{ton_{CO_2}}{907184\ g} * scc \left( \frac{\$}{ton} \right)$$

The results are then converted to \$2020. Chemical damages are calculated with the same equations embedded in the Water AHEAD model, but with unit chemical emissions.

There were a few limitations with the Water AHEAD model. Since our data source consistency varied, we did not specify the number of units installed for each treatment process, which is an option in the Water AHEAD GUI. Therefore, we build our treatment trains assuming one unit per treatment process. Additionally, not all possible treatment processes in a water reuse treatment train are listed as an option in the drinking water system tab of the GUI. As a result, we add them as a “new treatment process,” where the user specifies the minimum and maximum electricity consumption and chemicals used for this process. We did not include thermal energy consumption for the processes. For UV AOP processes, we used the 25<sup>th</sup> percentile to 75<sup>th</sup> percentile of electricity consumption surveyed from full-scale facilities with an average dose of 3 mg/L of H<sub>2</sub>O<sub>2</sub>.<sup>3</sup>

Electricity intensity, treatment objective, and chemical inputs for drinking water unit processes used in potable water reuse advanced treatment are detailed in Supporting Information of Gingerich and Mauter (2017).<sup>4</sup> For conventional drinking water processes, with exception to MF, UF and RO, we assumed water recovery of 99%. Recoveries for MF/ UF were set at 95%, while recovery for RO was set at 85%. The unit process BAF was modeled using generic filtration media. The minimums and maximum electricity consumption and recovery values for unit processes not specified in Gingerich and Mauter (2017) are in Table S3.

| Treatment Processes | EI Min | EI Max | Recovery |
|---------------------|--------|--------|----------|
| MBR                 | 0.5    | 0.7    | 0.95     |
| UVAOP               | 0.3    | 1      | 0.99     |

**Table S3.** Unit process electricity consumption for unit processes in Water AHEAD.

#### 4.0 Historical trends and location map of U.S. potable reuse systems as of 2020

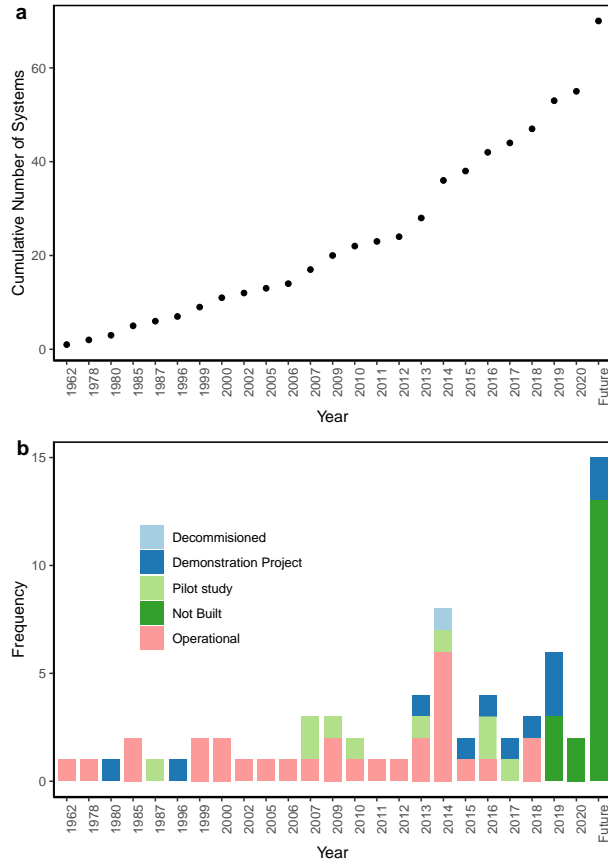

**Figure S1.** (a) Histogram of cumulative number of potable reuse systems built and classified by status over the past six decades. (b) Histogram of potable reuse systems by year of construction completion or development of pilot study and demonstration.

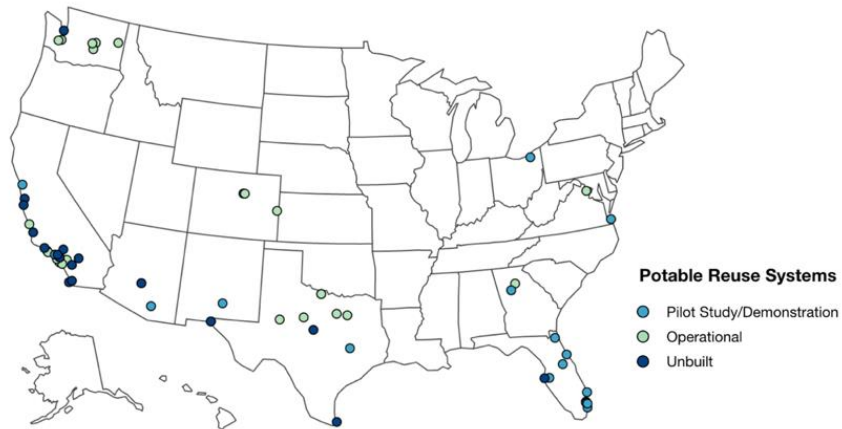

**Figure S2.** Map of U.S. Potable Reuse Systems as of 2020. Data points are not scaled to size of facility.

## References

- 1 Y. Liu and M. S. Mauter, Assessing the demand response capacity of U.S. drinking water treatment plants, *Appl. Energy*, 2020, **267**, 114899.
- 2 D. B. Gingerich and M. S. Mauter, *Water Associated Health and Environmental Air Damages (AHEAD) model*, OSF.
- 3 D. B. Miklos, C. Remy, M. Jekel, K. G. Linden, J. E. Drewes and U. Hübner, Evaluation of advanced oxidation processes for water and wastewater treatment – A critical review, *Water Res.*, 2018, **139**, 118–131.
- 4 D. B. Gingerich and M. S. Mauter, Air Emissions Damages from Municipal Drinking Water Treatment Under Current and Proposed Regulatory Standards, *Environ. Sci. Technol.*, 2017, **51**, 10299–10306.
